# Supplementary material
Source: Frontiers journal article supplement (https://www.frontiersin.org/articles/225752)
Supplement: Image_3.PDF [file Image_3.PDF]

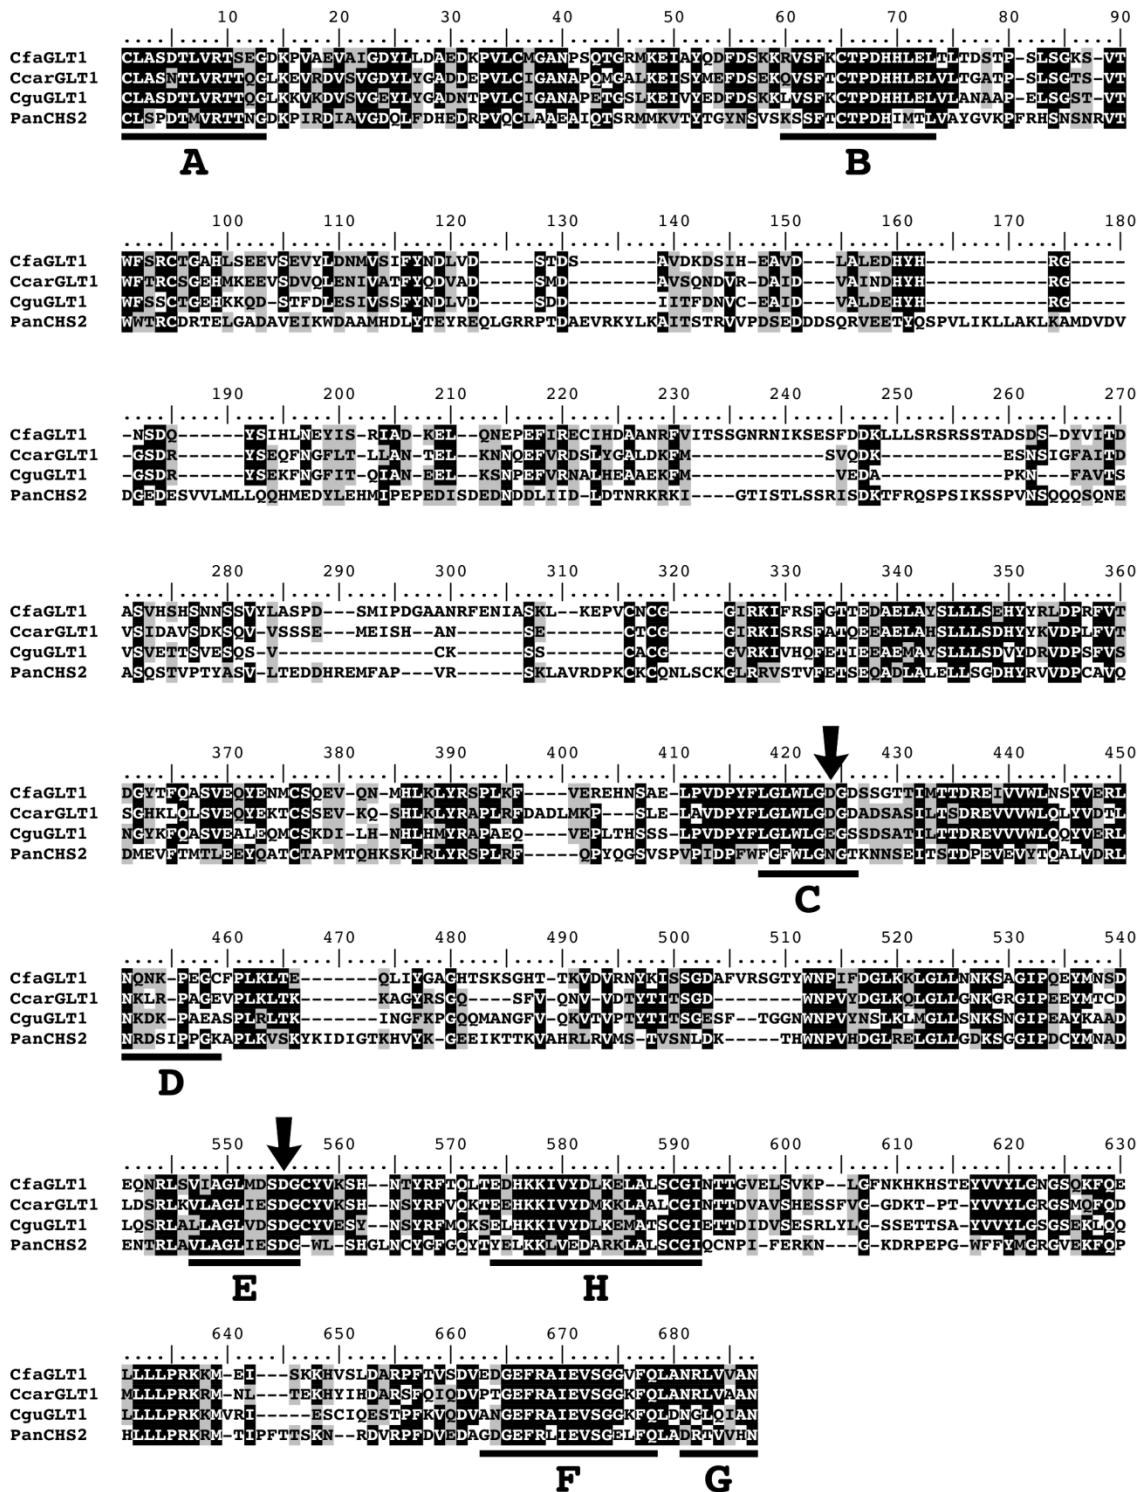

**Supplementary Figure 3:** amino acids sequence alignment, by Muscle, of GLT1 intein from different *Candida* species. The location of conserved motifs from splicing (A, B, F and G) and HE (C, D, E and H) domains are indicated. The arrows indicate the position of the two essential aspartic acids according to SceVMA intein.
